# Supplementary material for: Genome-wide phage susceptibility analysis in Acinetobacter baumannii reveals capsule modulation strategies that determine phage infectivity
Source: PubMed Central journal article supplement (PMC10249906; doi:10.1371/journal.ppat.1010928), 2023-06-08
Supplement: ppat.1010928.s011.pdf [file ppat.1010928.s011.pdf]

**S1 Table. Strains, plasmids, and primers used in this study**

**Strains**

| Designation                                        | Genotype or description                                                                                     | Strain ID      | Reference |
|----------------------------------------------------|-------------------------------------------------------------------------------------------------------------|----------------|-----------|
| <b><i>A. baumannii</i></b>                         |                                                                                                             |                |           |
| 17978                                              | cerebrospinal fluid isolate, AbaAL44 <sup>+</sup> ("UN") type, ATCC                                         | EGA83          | [1, 2]    |
| 17978 <i>bfmS</i> *                                | ATCC 17978 <i>bfmS</i> (G467Dfs*19)                                                                         | EGA127         | [3]       |
| 17978 $\Delta$ <i>bfmS</i>                         | ATCC 17978 $\Delta$ <i>bfmS</i> :: <i>aacC1</i>                                                             | EGA195         | [3]       |
| 17978 $\Delta$ <i>bfmRS</i>                        | ATCC 17978 $\Delta$ <i>bfmRS</i> :: <i>aacC1</i>                                                            | EGA495         | [7]       |
| 17978 $\Delta$ <i>itrA</i>                         | ATCC 17978 $\Delta$ <i>itrA</i>                                                                             | EGA295         | [3]       |
| 17978 $\Delta$ <i>wzc</i>                          | ATCC 17978 $\Delta$ <i>wzc</i> :: <i>aacC1</i> , isolate 27                                                 | EGA106-27      | [3]       |
| 17978 $\Delta$ <i>wzc wzc</i> <sup>+</sup>         | ATCC 17978 $\Delta$ <i>wzc</i> :: <i>aacC1</i> , <i>wzc</i> <sup>+</sup> by marker rescue of EGA106-27      | EGA260         | [3]       |
| 17978 $\Delta$ <i>dsbA</i>                         | ATCC 17978 $\Delta$ <i>dsbA</i>                                                                             | NRA134         | This work |
| 17978 $\Delta$ <i>lon</i>                          | ATCC 17978 $\Delta$ <i>lon</i>                                                                              | JBA154         | This work |
| 17978 $\Delta$ <i>gtrOC3</i>                       | ATCC 17978 $\Delta$ <i>gtrOC3</i>                                                                           | JBA160         | This work |
| 17978 $\Delta$ <i>gtrOC4</i>                       | ATCC 17978 $\Delta$ <i>gtrOC4</i>                                                                           | JBA161         | This work |
| 17978 $\Delta$ <i>gtr6</i>                         | ATCC 17978 $\Delta$ <i>gtr6</i>                                                                             | JBA202         | This work |
| 17978 $\Delta$ <i>rnaA</i>                         | ATCC 17978 $\Delta$ <i>rnaA</i>                                                                             | JBA211         | This work |
| 17978 $\Delta$ <i>slt</i>                          | ATCC 17978 $\Delta$ <i>slt</i>                                                                              | EGA520         | This work |
| 17978 $\Delta$ <i>rnaA</i> $\Delta$ <i>bfmRS</i>   | ATCC 17978 $\Delta$ <i>rnaA</i> $\Delta$ <i>bfmRS</i>                                                       | JBA234         | This work |
| 17978 $\Delta$ <i>dsbA</i> $\Delta$ <i>bfmRS</i>   | ATCC 17978 $\Delta$ <i>dsbA</i> $\Delta$ <i>bfmRS</i>                                                       | JBA235         | This work |
| 17978 <i>bfmS</i> * $\Delta$ <i>itrA</i>           | ATCC 17978 <i>bfmS</i> (G467Dfs*19) $\Delta$ <i>itrA</i>                                                    | JBA210         | This work |
| 17978 $\Delta$ <i>bfmS</i> * $\Delta$ <i>gtr6</i>  | ATCC 17978 $\Delta$ <i>bfmS</i> :: <i>aacC1</i> $\Delta$ <i>gtr6</i>                                        | JBA208         | This work |
| 17978 $\Delta$ <i>gtrOC3</i> $\Delta$ <i>itrA</i>  | ATCC 17978 $\Delta$ <i>gtrOC3</i> $\Delta$ <i>itrA</i>                                                      | JBA212         | This work |
| 17978 $\Delta$ <i>gtrOC3</i> $\Delta$ <i>gtr6</i>  | ATCC 17978 $\Delta$ <i>gtrOC3</i> $\Delta$ <i>gtr6</i>                                                      | JBA215         | This work |
| 17978 $\Delta$ <i>dsbA</i> /-                      | NRA134 with pYDE152                                                                                         | JBA172         | This work |
| 17978 $\Delta$ <i>dsbA</i> / <i>dsbA</i>           | NRA134 with pJE101 (P(IPTG)- <i>dsbA</i> )                                                                  | JBA168         | This work |
| 17978 $\Delta$ <i>lon</i> /-                       | JBA154 with pYDE152                                                                                         | JBA174         | This work |
| 17978 $\Delta$ <i>lon</i> / <i>lon</i>             | JBA154 with pJE103 (P(IPTG)- <i>lon</i> )                                                                   | JBA170         | This work |
| 17978 $\Delta$ <i>gtrOC3</i> /-                    | JBA160 with pYDE152                                                                                         | JBA171         | This work |
| 17978 $\Delta$ <i>gtrOC3</i> / <i>gtrOC3</i>       | JBA160 with pJE100 (P(IPTG)- <i>gtrOC3</i> )                                                                | JBA167         | This work |
| 17978 $\Delta$ <i>gtrOC4</i> /-                    | JBA161 with pYDE152                                                                                         | JBA173         | This work |
| 17978 $\Delta$ <i>gtrOC4</i> / <i>gtrOC4</i>       | JBA161 with pJE102 (P(IPTG)- <i>gtrOC4</i> )                                                                | JBA169         | This work |
| 17978 $\Delta$ <i>rnaA</i> /-                      | JBA211 with pYDE152                                                                                         | JBA218         | This work |
| 17978 $\Delta$ <i>rnaA</i> /-                      | JBA211 with pJE127 (P(IPTG)- <i>rnaA</i> )                                                                  | JBA217         | This work |
| 17978 $\Delta$ <i>itrA</i> /-                      | EGA295 with pYDE152                                                                                         | JBA270         | This work |
| 17978 $\Delta$ <i>itrA</i> / <i>itrA</i>           | EGA295 with pJE172 (P(IPTG)- <i>itrA</i> )                                                                  | JBA271         | This work |
| 17978 + P(IPTG)- <i>rnaA</i>                       | ATCC 17978 WT with pJE127 (P(IPTG)- <i>rnaA</i> )                                                           | JBA266         | This work |
| 17978 <i>bfmS</i> * + P(IPTG)- <i>rnaA</i>         | EGA127 with pJE127 (P(IPTG)- <i>rnaA</i> )                                                                  | JBA256         | This work |
| 17978 + P(IPTG)- <i>dsbA</i>                       | ATCC 17978 WT with pJE101 (P(IPTG)- <i>dsbA</i> )                                                           | JBA349         | This work |
| 17978 <i>gtr6440A</i> <sub>9→8</sub>               | Loki non-susceptible derivative of WT ATCC 17978 ( <i>gtr6440A</i> <sub>9→8</sub> ), 2 independent isolates | JBA149, JBA267 | This work |
| 17978 <i>wzx377T</i> <sub>9→10</sub>               | Loki non-susceptible derivative of WT ATCC 17978 ( <i>wzx377T</i> <sub>9→10</sub> )                         | JBA150         | This work |
| 17978 <i>bfmS</i> * <i>gtr6440A</i> <sub>9→8</sub> | Loki non-susceptible derivative of EGA127 ( <i>gtr6440A</i> <sub>9→8</sub> )                                | JBA151         | This work |
| 17978 <i>bfmS</i> * <i>bfmR</i> (G100D)            | Loki non-susceptible derivative of EGA127 [ <i>bfmR</i> (G100D)]                                            | JBA152         | This work |

**S1 Table (continued)**

|                                                             |                                                                                                                                                                            |                |            |
|-------------------------------------------------------------|----------------------------------------------------------------------------------------------------------------------------------------------------------------------------|----------------|------------|
| 17978 <i>bfmS*</i> <i>bfmR</i> (T85I)                       | Loki non-susceptible derivative of EGA127 [ <i>bfmR</i> (T85I)]                                                                                                            | JBA153         | This work  |
| 17978 <i>bfmS*</i> <i>gtr6384A</i> <sub>8→7</sub>           | Loki non-susceptible derivative of EGA127 ( <i>gtr6384A</i> <sub>8→7</sub> )                                                                                               | JBA261         | This work  |
| 17978 $\Delta$ <i>bfmS</i> <i>gtr6440A</i> <sub>9→8</sub>   | Loki non-susceptible derivative of EGA195 ( <i>gtr6440A</i> <sub>9→8</sub> )                                                                                               | JBA268         | This work  |
| 17978 <i>gtr6440A</i> <sub>9→8</sub> /-                     | JBA149 with pYDE152                                                                                                                                                        | JBA204         | This work  |
| 17978 <i>gtr6440A</i> <sub>9→8</sub> / <i>gtr6</i>          | JBA149 with pJE121 (P(IPTG)- <i>gtr6</i> )                                                                                                                                 | JBA205         | This work  |
| 17978 10840p-GFP                                            | ATCC 17978 WT with pEGE246 (10840p-GFP)                                                                                                                                    | EGA616         | [7]        |
| 17978 $\Delta$ <i>bfmRS</i> 10840p-GFP                      | EGA495 with pEGE246 (18040p-GFP)                                                                                                                                           | NRA104         | This work  |
| 17978 $\Delta$ <i>dsbA</i> 10840p-GFP                       | NRA134 with pEGE246 (18040p-GFP)                                                                                                                                           | NRA178         | This work  |
| 17978 $\Delta$ <i>dsbA</i> $\Delta$ <i>bfmRS</i> 10840p-GFP | JBA235 with pEGE246 (18040p-GFP)                                                                                                                                           | NRA236         | This work  |
| 17978 $\Delta$ <i>rnaA</i> 10840p-GFP                       | JBA211 with pEGE246 (18040p-GFP)                                                                                                                                           | NRA238         | This work  |
| 17978 $\Delta$ <i>rnaA</i> $\Delta$ <i>bfmRS</i> 10840p-GFP | JBA234 with pEGE246 (18040p-GFP)                                                                                                                                           | NRA240         | This work  |
| 17978 <i>adcp</i> -GFP                                      | ATCC 17978 WT with pEGE313 ( <i>adcp</i> -GFP)                                                                                                                             | EGA786         | [7]        |
| 17978 $\Delta$ <i>dsbA</i> <i>adcp</i> -GFP                 | NRA134 with pEGE313 ( <i>adcp</i> -GFP)                                                                                                                                    | NRA237         | This work  |
| 17978 $\Delta$ <i>rnaA</i> <i>adcp</i> -GFP                 | JBA211 with pEGE313 ( <i>adcp</i> -GFP)                                                                                                                                    | NRA239         | This work  |
| 17961                                                       | blood isolate, ATCC                                                                                                                                                        | EGA56          | [1]        |
| 19606                                                       | urine isolate, ATCC                                                                                                                                                        | EGA2M          | [1]        |
| 19606 $\Delta$ <i>bfmS</i>                                  | ATCC 19606 $\Delta$ <i>bfmS</i> :: <i>aacC1</i>                                                                                                                            | EGA216         | [3]        |
| AB5075                                                      | bone isolate/osteomyelitis, AB5075-UW                                                                                                                                      | EGA714         | [4]        |
| AB5075 <i>bfmS</i> ::Tn                                     | AB5075-UW <i>bfmS</i> 115::T26                                                                                                                                             | EGA725         | [4]        |
| BAA-1790                                                    | sputum isolate (2008, Washington, DC), ATCC                                                                                                                                | JBA394         | [6]        |
| BAA-1790 $\Delta$ <i>rnaA</i>                               | BAA-1790 $\Delta$ <i>rnaA</i> , via allele exchange with pJE193                                                                                                            | JBA395         | This work  |
| BAA-1790 $\Delta$ <i>dsbA</i>                               | BAA-1790 $\Delta$ <i>dsbA</i> , via allele exchange with pJE195                                                                                                            | JBA396         | This work  |
| EGA10                                                       | wound isolate, Tufts University Medical Center, ST2                                                                                                                        | EGA10          | This work  |
| EGA65                                                       | blood isolate, Tufts University Medical Center, ST2                                                                                                                        | EGA65          | This work  |
| EGA10/-                                                     | EGA10 with pYDE152                                                                                                                                                         | JBA246         | This work  |
| EGA10/ <i>gtr6</i>                                          | EGA10 with pJE121 (P(IPTG)- <i>gtr6</i> )                                                                                                                                  | JBA247         | This work  |
| EGA65/-                                                     | EGA65 with pYDE152                                                                                                                                                         | JBA248         | This work  |
| EGA65/ <i>gtr6</i>                                          | EGA65 with pJE121 (P(IPTG)- <i>gtr6</i> )                                                                                                                                  | JBA249         | This work  |
| <b><i>E. coli</i></b>                                       |                                                                                                                                                                            |                |            |
| DH5 $\alpha$                                                | <i>supE44</i> $\Delta$ <i>lacU169</i> ( $\phi$ 80 <i>lacZ</i> $\Delta$ M15) <i>hsdR17</i> <i>recA1</i> <i>endA1</i> <i>gyrA96</i> <i>thi-1</i> <i>relA1</i>                | EGE1           | [8]        |
| DH5 $\lambda$ pir                                           | DH5 $\alpha$ ( $\lambda$ pir) <i>tet</i> ::Mu <i>recA</i>                                                                                                                  | EGE4           | [9]        |
| XL1-blue                                                    | <i>recA1</i> <i>endA1</i> <i>gyrA96</i> <i>thi-1</i> <i>hsdR17</i> <i>supE44</i> <i>relA1</i> <i>lac</i> [F' <i>proAB</i> <i>lac</i> <sup>q</sup> Z $\Delta$ M15 Tn10 Tc'] | AFE81          | Stratagene |
| <b><i>Bacteriophage</i></b>                                 |                                                                                                                                                                            |                |            |
| Loki                                                        | vB_AbaS_Loki, lytic <i>Acinetobacter</i> siphovirus isolated from activated sewage sludge                                                                                  | Loki           | [10]       |
| Loki*                                                       | Derivative of Loki showing enhanced virulence vs 17978 and BAA-1790                                                                                                        | JB $\Phi$ -15C | This work  |

## S1 Table (continued)

### Plasmids

| Plasmid | Description                                                                                                     | Reference |
|---------|-----------------------------------------------------------------------------------------------------------------|-----------|
| pUC18   | <i>oriColE1</i> MCS Cb <sup>r</sup>                                                                             | [11]      |
| pSR47S  | Conditionally replicating allele exchange plasmid ( <i>oriTRP4 oriR6K sacB</i> Km <sup>r</sup> )                | [12]      |
| pJB4648 | Conditionally replicating allele exchange plasmid ( <i>oriTRP4 oriR6K sacB</i> Gm <sup>r</sup> )                | [12]      |
| pEGE305 | P(IPTG) shuttle vector ( <i>ori-pBR322 ori-pWH1277 bla::lac<sup>r</sup>-T5lacP</i> Tc <sup>r</sup> )            | [7]       |
| pYDE152 | P(IPTG) shuttle vector ( <i>ori-pBR322 ori-pWH1277 bla::lac<sup>r</sup>-T5lacP-MCS</i> Tc <sup>r</sup> )        | [13]      |
| pDL1100 | <i>Himar1 mariner</i> (Km <sup>r</sup> ) delivery plasmid, C9 transposase ( <i>ori-pSC101</i> Cb <sup>r</sup> ) | [14]      |
| pJE89   | pUC18 containing homology arm upstream of <i>gtrOC3</i>                                                         | This work |
| pJE90   | pUC18 containing homology arm downstream of <i>gtrOC3</i>                                                       | This work |
| pJE93   | pJB4648:: <i>ΔgtrOC3</i> allele exchange construct                                                              | This work |
| pJE91   | pUC18 containing homology arm upstream of <i>gtrOC4</i>                                                         | This work |
| pJE92   | pUC18 containing homology arm downstream of <i>gtrOC4</i>                                                       | This work |
| pJE94   | pJB4648:: <i>ΔgtrOC4</i> allele exchange construct                                                              | This work |
| pJE114  | pUC18 containing homology arm upstream of <i>gtr6</i>                                                           | This work |
| pJE115  | pUC18 containing homology arm downstream of <i>gtr6</i>                                                         | This work |
| pJE118  | pJB4648:: <i>Δgtr6</i> allele exchange construct                                                                | This work |
| pJE122  | pUC18 containing homology arm upstream of <i>maA</i>                                                            | This work |
| pJE123  | pUC18 containing homology arm downstream of <i>maA</i>                                                          | This work |
| pJE124  | pJB4648:: <i>ΔrnaA</i> allele exchange construct                                                                | This work |
| pEGE242 | pSR47S:: <i>Δslt</i> allele exchange construct                                                                  | This work |
| pEGE133 | pSR47S:: <i>ΔbfmRS::aacC1</i> allele exchange construct                                                         | [3]       |
| pEGE125 | pSR47S:: <i>ΔbfmS::aacC1</i> allele exchange construct                                                          | [3]       |
| pEGE181 | pSR47S:: <i>ΔitrA</i> allele exchange construct                                                                 | [3]       |
| pJE95   | pUC18:: <i>gtrOC3</i>                                                                                           | This work |
| pJE99   | pUC18:: <i>gtrOC4</i>                                                                                           | This work |
| pJE120  | pUC18:: <i>gtr6</i>                                                                                             | This work |
| pJE171  | pUC18:: <i>itrA</i>                                                                                             | This work |
| pJE126  | pUC18:: <i>maA</i>                                                                                              | This work |
| pJE97   | pUC18:: <i>lon</i>                                                                                              | This work |
| pJE98   | pUC18:: <i>dsbA</i>                                                                                             | This work |
| pJE100  | pYDE152:: <i>gtrOC3</i> (P(IPTG)- <i>gtrOC3</i> )                                                               | This work |
| pJE102  | pYDE152:: <i>gtrOC4</i> (P(IPTG)- <i>gtrOC4</i> )                                                               | This work |
| pJE121  | pYDE152:: <i>gtr6</i> (P(IPTG)- <i>gtr6</i> )                                                                   | This work |
| pJE172  | pYDE152:: <i>itrA</i> (P(IPTG)- <i>itrA</i> )                                                                   | This work |
| pJE127  | pYDE152:: <i>maA</i> (P(IPTG)- <i>maA</i> )                                                                     | This work |
| pJE103  | pYDE152:: <i>lon</i> (P(IPTG)- <i>lon</i> )                                                                     | This work |
| pJE101  | pYDE152:: <i>dsbA</i> (P(IPTG)- <i>dsbA</i> )                                                                   | This work |
| pEGE246 | <i>ACX60_RS18040p-gfpmut3</i> reporter plasmid ( <i>ori-pBR322 ori-pWH1277</i> , Tc <sup>r</sup> )              | [7]       |
| pEGE313 | <i>adcp-gfpmut3</i> reporter plasmid ( <i>ori-pBR322 ori-pWH1277</i> , Tc <sup>r</sup> )                        | [7]       |
| pJE193  | pSR47S:: <i>ΔrnaA</i> (BAA-1790) allele exchange construct                                                      | This work |
| pJE195  | pSR47S:: <i>ΔdsbA</i> (BAA-1790) allele exchange construct                                                      | This work |

**S1 Table (continued)**

**Oligonucleotide primers**

| Primer name                                         | Sequence (5' – 3'; restriction site underlined if present) | RE site(s) |
|-----------------------------------------------------|------------------------------------------------------------|------------|
| <b>Complementation and localization experiments</b> |                                                            |            |
| dsbA-F                                              | <u>CGAGCTCTAGAGG</u> AAAAGCTGTAACAATGAAA                   | SacI       |
| dsbA-R                                              | AAA <u>ACTGCAGG</u> CAATAAACTATTATTTTGCCTTAC               | PstI       |
| lon-F                                               | <u>CGAGCTC</u> ATTAGGAGTGCCCATGTCTG                        | SacI       |
| lon-R                                               | AAA <u>ACTGCAGG</u> TGAATTAGTGACGCGCTGCTTTTG               | PstI       |
| gtrOC3-F                                            | <u>CGAGCTCGCTAA</u> AGGACGTTATAAGTTATGAAT                  | SacI       |
| gtrOC3-R                                            | AAA <u>ACTGCAGG</u> GCTTGCCTACTTATTTTTATCTTTATTTC          | PstI       |
| gtrOC4-F                                            | <u>CGAGCTCGATA</u> AAAAATAAGTAGGCAAGCTATGAAAATTG           | SacI       |
| gtrOC4-R                                            | AAA <u>ACTGCAGTAA</u> TTAAGTTTTTCAGCAGGCCTTTAT             | PstI       |
| gtr6-F                                              | <u>CGAGCTCTAAGG</u> TACTATATGAAAATTGGATTG                  | SacI       |
| gtr6-R                                              | AAA <u>ACTGCAGC</u> ACCTACGACATCATTATTAGGTACA              | PstI       |
| itrA-F                                              | <u>CGAGCTCGACT</u> GTTACCAGCGAATTTATTA                     | SacI       |
| itrA-R                                              | TG <u>TACTGCAG</u> CCGGCTACTGGTAAA <u>ACTG</u>             | PstI       |
| rnaA-F                                              | <u>CGAGCTCAAT</u> GATGGAACATTCTTTTAATTG                    | SacI       |
| rnaA-R                                              | AAA <u>ACTGCAGG</u> GTTATTGCTCTTAATAACTGCCT                | PstI       |
| <b>Gene deletion</b>                                |                                                            |            |
| gtrOC4-upF                                          | ACGCGT <u>CGAC</u> GTGCCCGAGTTTTGCTTATC                    | Sall       |
| gtrOC4-upR                                          | GGGGT <u>ACCCTGA</u> ACAATTTTCATAGCTTGCCTAC                | KpnI       |
| gtrOC4-downF                                        | GGGGT <u>ACC</u> GGCCTGCTGAAA <u>ACTTA</u> ATTATTTTTGGTG   | KpnI       |
| gtrOC4-downR                                        | AAATAT <u>GCGGCC</u> CGCTATATGCGCTTTGGCTGGT                | NotI       |
| gtrOC3-upF                                          | ACGCGT <u>CGACT</u> GACTTGCCAAAAAGATCC                     | Sall       |
| gtrOC3-upR                                          | GGGGT <u>ACCACAT</u> GGAATTTTATTCATAACTTATAACG             | KpnI       |
| gtrOC3-downF                                        | GGGGT <u>ACC</u> TAGGCAAGCTATGAAAATTGTT <u>CAGG</u> T      | KpnI       |
| gtrOC3-downR                                        | AAATAT <u>GCGGCC</u> GCTCAGTTCAGCCTTGCTTTT                 | NotI       |
| gtr6-UP-F                                           | ACGCGT <u>CGAC</u> GGCATATGCAATCTCAGG                      | Sall       |
| gtr6-UP-R                                           | GGGGT <u>ACTGT</u> CAATCCAATTTTCATATAGTA                   | KpnI       |
| gtr6-DOWN-F                                         | GGGGT <u>ACC</u> ACTATTGGTATTTAATATGTTATCTTGT              | KpnI       |
| gtr6-DOWN-R                                         | AAATAT <u>GCGGCC</u> GCATGATGCTAGCCCAATCC                  | NotI       |
| Dlon-up-F                                           | <u>GGATCCT</u> TAGCGCTTCCTTCACG                            | BamHI      |
| Dlon-up-R                                           | <u>GGTACC</u> CATAATAAGTTCAGACATGGGC                       | KpnI       |
| Dlon-dwn-F                                          | <u>GGTACC</u> GCAGCGCGTCACTAATTC                           | KpnI       |
| Dlon-dwn-R                                          | <u>GTCGACC</u> GATGTAAGGCAGGACCC                           | Sall       |
| rnaA-UP-F                                           | ACGCGT <u>CGAC</u> GCGATAGTAATTCTAAAAACACG                 | Sall       |
| DrnaA-UP-F1790                                      | ACGCGT <u>CGAC</u> GCGATAGTAATTCTAAGAATACGG                | Sall       |
| rnaA-UP-R                                           | GGGGT <u>ACC</u> CATATTTCAATTAATAAACTTGGTTATG              | KpnI       |
| rnaA-DOWN-F                                         | GGGGT <u>ACC</u> GGCAGTTATTAAGAGCAATAACCA                  | KpnI       |
| rnaA-DOWN-R                                         | AAATAT <u>GCGGCC</u> GCAGAAGCAGCAGAAGACAAAC                | NotI       |
| Dslt-upF                                            | CACCT <u>GGATCC</u> GTCTCACCACGATATCCATTAC                 | BamHI      |
| Dslt-upR                                            | CATAGGT <u>ACTTT</u> CATCACACGACTCTTGTTTG                  | KpnI       |
| Dslt-dwnF                                           | AGT <u>CGGTACC</u> ACGCGATCATCACCTTAGTTTTAG                | KpnI       |
| Dslt-dwnR                                           | ATCTT <u>GCGGCC</u> GCATTTACCGCTTGCGATAC                   | NotI       |

## S1 Table (continued)

| <b>qRT-PCR</b> |                         |
|----------------|-------------------------|
| wza-F          | CTGGCTATTCACCTGCACAAAC  |
| wza-R          | CCTGACTCACCCATCACATAAA  |
| gna-F          | GCGGGTAGTAAGTGGAAC TTT  |
| gna-R          | AACCTACCTCTTCTGCTTTATGG |
| rnaA-qRT-F     | GTGCGCTAGACCCTTCTAAAC   |
| rnaA-qRT-R     | ACAGTCAGTTCTGGTGGTTTC   |

## References

1. Bouvet P, Grimont P. Taxonomy of the Genus *Acinetobacter* with the Recognition of *Acinetobacter baumannii* sp. nov. *Acinetobacter haemolyticus* sp. nov. *Acinetobacter johnsonii* sp. nov. and *Acinetobacter junii* sp. nov. and Emended Descriptions of *Acinetobacter calcoaceticus* and *Acinetobacter Iwoffii*. International Journal of Systematic Bacteriology. 1986;36(2):228-40.
2. Wijers CDM, Pham L, Menon S, Boyd KL, Noel HR, Skaar EP, et al. Identification of Two Variants of *Acinetobacter baumannii* Strain ATCC 17978 with Distinct Genotypes and Phenotypes. Infect Immun. 2021;89(12):e0045421. Epub 20210830. doi: 10.1128/IAI.00454-21. PubMed PMID: 34460288; PubMed Central PMCID: PMCPCMC8594612.
3. Geisinger E, Isberg RR. Antibiotic modulation of capsular exopolysaccharide and virulence in *Acinetobacter baumannii*. PLoS Pathog. 2015;11(2):e1004691. Epub 2015/02/14. doi: 10.1371/journal.ppat.1004691. PubMed PMID: 25679516; PubMed Central PMCID: PMCPCMC4334535.
4. Gallagher LA, Ramage E, Weiss EJ, Radey M, Hayden HS, Held KG, et al. Resources for Genetic and Genomic Analysis of Emerging Pathogen *Acinetobacter baumannii*. J Bacteriol. 2015;197(12):2027-35. doi: 10.1128/JB.00131-15. PubMed PMID: 25845845; PubMed Central PMCID: PMCPCMC4438207.
5. Gallagher LA, Lee SA, Manoil C. Importance of Core Genome Functions for an Extreme Antibiotic Resistance Trait. MBio. 2017;8(6). Epub 2017/12/14. doi: 10.1128/mBio.01655-17. PubMed PMID: 29233894; PubMed Central PMCID: PMCPCMC5727411.
6. Korotetskiy IS, Joubert M, Magabotha SM, Jumagaziyeva AB, Shilov SV, Suldina NA, et al. Complete Genome Sequence of Collection Strain *Acinetobacter baumannii* ATCC BAA-1790, Used as a Model To Study the Antibiotic Resistance Reversion Induced by Iodine-Containing Complexes. Microbiol Resour Announc. 2020;9(3). Epub 20200116. doi: 10.1128/MRA.01467-19. PubMed PMID: 31948971; PubMed Central PMCID: PMCPCMC6965589.
7. Geisinger E, Mortman NJ, Vargas-Cuebas G, Tai AK, Isberg RR. A global regulatory system links virulence and antibiotic resistance to envelope homeostasis in *Acinetobacter baumannii*. PLoS Pathog. 2018;14(5):e1007030. Epub 2018/05/26. doi: 10.1371/journal.ppat.1007030. PubMed PMID: 29795704; PubMed Central PMCID: PMCPCMC5967708.
8. Hanahan D, Jessee J, Bloom FR. Plasmid transformation of *Escherichia coli* and other bacteria. Methods Enzymol. 1991;204:63-113. Epub 1991/01/01. doi: 0076-6879(91)04006-A [pii]. PubMed PMID: 1943786.
9. Kolter R, Inuzuka M, Helinski DR. Trans-complementation-dependent replication of a low molecular weight origin fragment from plasmid R6K. Cell. 1978;15(4):1199-208. Epub 1978/12/01. doi: 0092-8674(78)90046-6 [pii]. PubMed PMID: 728998.
10. Turner D, Wand ME, Briers Y, Lavigne R, Sutton JM, Reynolds DM. Characterisation and genome sequence of the lytic *Acinetobacter baumannii* bacteriophage vB\_AbaS\_Loki. PLoS One. 2017;12(2):e0172303. Epub 2017/02/17. doi: 10.1371/journal.pone.0172303. PubMed PMID: 28207864; PubMed Central PMCID: PMCPCMC5313236.
11. Yanisch-Perron C, Vieira J, Messing J. Improved M13 phage cloning vectors and host strains: nucleotide sequences of the M13mp18 and pUC19 vectors. Gene. 1985;33(1):103-19. Epub 1985/01/01. PubMed PMID: 2985470.
12. Andrews HL, Vogel JP, Isberg RR. Identification of linked *Legionella pneumophila* genes essential for intracellular growth and evasion of the endocytic pathway. Infect Immun. 1998;66(3):950-8. PubMed PMID: 9488381.
13. Bai J, Dai Y, Farinha A, Tang AY, Syal S, Vargas-Cuebas G, et al. Essential gene analysis in *Acinetobacter baumannii* by high-density transposon mutagenesis and CRISPR interference. J Bacteriol. 2021;203(12). Epub 2021/03/31. doi: 10.1128/JB.00565-20. PubMed PMID: 33782056.
14. Geisinger E, Mortman NJ, Dai Y, Cokol M, Syal S, Farinha A, et al. Antibiotic susceptibility signatures identify potential antimicrobial targets in the *Acinetobacter baumannii* cell envelope. Nature Communications. 2020;11(1):4522. doi: 10.1038/s41467-020-18301-2. PubMed Central PMCID: PMCPCMC7481262.
