# Supplementary material for: Genome-wide phage susceptibility analysis in Acinetobacter baumannii reveals capsule modulation strategies that determine phage infectivity
Source: PubMed Central journal article supplement (PMC10249906; doi:10.1371/journal.ppat.1010928), 2023-06-08
Supplement: ppat.1010928.s012.pdf [file ppat.1010928.s012.pdf]

**S2 Table. Spontaneous *gtr6* mutations conferring phage Loki resistance**

| <i>gtr6</i> mutation | residue changes | strain(s), this study | KL         | additional strains (Genbank) <sup>b</sup> |            |      | additional strains (PATRIC) <sup>b</sup> |                 |      |
|----------------------|-----------------|-----------------------|------------|-------------------------------------------|------------|------|------------------------------------------|-----------------|------|
|                      |                 |                       |            | strain name                               | accession  | KL   | strain name                              | accession       | KL   |
| 440A <sub>9→8</sub>  | V142Gfs*8       | JBA149 <sup>a</sup>   | 3          | VB2107                                    | CP051474.1 | 3    | 2015ZJAB25                               | WQMN01000013    | 3    |
|                      |                 |                       | 3          | ABUH763                                   | CP035051.1 | 22   | 2087                                     | VMKD01000009    | 3    |
|                      |                 | JBA267 <sup>a</sup>   | 3          | AC29                                      | CP007535.2 | 3    | 208510                                   | VMJJ01000010    | 3    |
|                      |                 |                       | 3          | AC30                                      | CP007577.1 | 3    | 24860_4                                  | JFDE01000009    | 22   |
|                      |                 | JBA268 <sup>a</sup>   | 3          | 2018BJAB1                                 | CP059351.1 | 3    | 4300STDY7045687                          | UFIZ01000012    | 3    |
|                      |                 |                       |            | 2018BJAB2                                 | CP059350.1 | 3    | 4300STDY7045767                          | UFKE01000006    | 3    |
|                      |                 |                       | 3          | 2022CK-00784                              | CP117764.1 | 3    | Ab83 strain D86                          | UEJK01000064    | 3    |
|                      |                 |                       |            |                                           |            |      | C248                                     | JAAZUG010000023 | 3    |
|                      |                 |                       |            |                                           |            |      | PWa17_1044                               | JAJMQN010000011 | 3    |
|                      |                 |                       |            |                                           |            |      | PWb12_715                                | JAJMPV010000012 | 3    |
|                      |                 |                       |            |                                           |            |      | PWb48_2085                               | JAJMPN010000016 | 3    |
|                      |                 |                       |            |                                           |            |      | PWb63_2087                               | JAJMPG010000011 | 3    |
|                      |                 |                       |            |                                           |            |      | SP2107                                   | JAAGSY010000002 | 3    |
|                      |                 | 384A <sub>8→7</sub>   | M150Cfs*22 | JBA261 <sup>a</sup>                       | 3          | none |                                          |                 | none |
| 425::ISAba13         | I131Ffs*6       | EGA10                 | 22         | none                                      |            |      | none                                     |                 |      |
|                      |                 | EGA65                 | 22         |                                           |            |      |                                          |                 |      |

<sup>a</sup>ATCC 17978 background

<sup>b</sup>listed genomes had >75x sequencing coverage except C248 (24x), and no assembly anomalies
